# Supplementary material
Source: HighWire-hosted journal article supplement (http://jpet.aspetjournals.org/highwire/filestream/135633/field_highwire_adjunct_files/1/JPET_184796_Supplemental_Figure_1.pdf)
Supplement: JPET_184796_Supplemental_Figure_1.pdf [file JPET_184796_Supplemental_Figure_1.pdf]

JPET #184796

**Supplemental data**

**Glucocorticoids Improve Renal Responsiveness to ANP by Upregulating NPR-A Expression  
in the Renal Inner Medullary Collecting Duct in Decompensated Heart Failure**

Chao Liu, Ying Chen, Yunxiao Kang, Zhihua Ni, Heming Xiu, Jing Guan, Kunshen Liu

**The Journal of Pharmacology and Experimental Therapeutics**

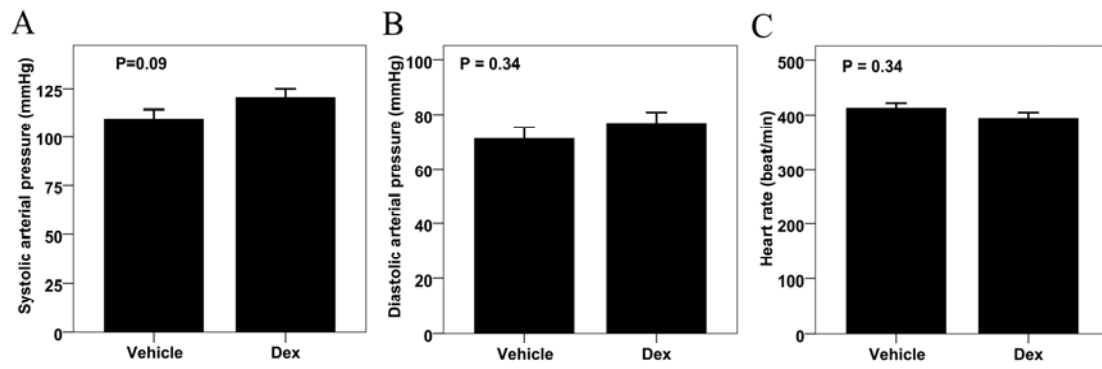

**Supplemental Figure 1. The effect of Dex on systolic arterial pressure, diastolic arterial pressure, and heart rate. A.** The effect of Dex on systolic arterial pressure. **B.** The effect of Dex on diastolic arterial pressure. **C.** The effect of Dex on heart rate.
